# Supplementary material for: Patient attendance at a pediatric emergency referral hospital in an area with low COVID-19 incidence
Source: PubMed Central journal article supplement (PMC8516272; doi:10.1371/journal.pone.0258478), 2021-10-14
Supplement: pone.0258478.s001.pdf [file pone.0258478.s001.pdf]

**S1 Table. Changes in the number of outpatients by month and year: Total pediatric outpatients.**

|       | 2017 | 2018 | 2019 | 2020 |
|-------|------|------|------|------|
| Jan   | 774  | 786  | 807  | 618  |
| Feb   | 685  | 646  | 665  | 534  |
| March | 777  | 761  | 783  | 559  |
| April | 649  | 581  | 754  | 430  |
| May   | 739  | 729  | 723  | 419  |
| June  | 769  | 626  | 711  | 495  |
| July  | 832  | 882  | 873  | 570  |
| Aug   | 830  | 925  | 892  | 672  |
| Sep   | 780  | 659  | 754  | 604  |
| Oct   | 690  | 603  | 685  | 586  |
| Nov   | 635  | 579  | 559  | 533  |
| Dec   | 756  | 753  | 630  | 604  |
