# Supplementary material for: Patient attendance at a pediatric emergency referral hospital in an area with low COVID-19 incidence
Source: PubMed Central journal article supplement (PMC8516272; doi:10.1371/journal.pone.0258478), 2021-10-14
Supplement: pone.0258478.s002.pdf [file pone.0258478.s002.pdf]

**S2 Table. Changes in the number of outpatients by month and year: Pediatric emergency outpatients**

|       | 2017 | 2018 | 2019 | 2020 |
|-------|------|------|------|------|
| Jan   | 332  | 367  | 361  | 204  |
| Feb   | 256  | 253  | 258  | 142  |
| March | 263  | 248  | 285  | 97   |
| April | 263  | 263  | 323  | 78   |
| May   | 324  | 297  | 343  | 96   |
| June  | 257  | 236  | 256  | 123  |
| July  | 413  | 434  | 327  | 170  |
| Aug   | 389  | 341  | 338  | 184  |
| Sep   | 327  | 286  | 345  | 151  |
| Oct   | 269  | 206  | 242  | 149  |
| Nov   | 241  | 179  | 135  | 164  |
| Dec   | 315  | 324  | 189  | 137  |
