# Supplementary material for: Patient attendance at a pediatric emergency referral hospital in an area with low COVID-19 incidence
Source: PubMed Central journal article supplement (PMC8516272; doi:10.1371/journal.pone.0258478), 2021-10-14
Supplement: pone.0258478.s003.pdf [file pone.0258478.s003.pdf]

**S3 Table. Changes in the number of outpatients by month and year: Referral outpatients.**

|       | 2017 | 2018 | 2019 | 2020 |
|-------|------|------|------|------|
| Jan   | 123  | 126  | 145  | 145  |
| Feb   | 112  | 119  | 138  | 110  |
| March | 104  | 113  | 153  | 91   |
| April | 123  | 130  | 165  | 89   |
| May   | 154  | 139  | 161  | 82   |
| June  | 157  | 124  | 146  | 114  |
| July  | 161  | 206  | 186  | 117  |
| Aug   | 153  | 182  | 178  | 110  |
| Sep   | 190  | 157  | 180  | 106  |
| Oct   | 124  | 116  | 152  | 97   |
| Nov   | 126  | 130  | 121  | 95   |
| Dec   | 139  | 140  | 148  | 102  |
