# Supplementary material for: Patient attendance at a pediatric emergency referral hospital in an area with low COVID-19 incidence
Source: PubMed Central journal article supplement (PMC8516272; doi:10.1371/journal.pone.0258478), 2021-10-14
Supplement: pone.0258478.s004.pdf [file pone.0258478.s004.pdf]

**S4 Table. Changes in the number of inpatients by month and year: General pediatric inpatients.**

|       | 2017 | 2018 | 2019 | 2020 |
|-------|------|------|------|------|
| Jan   | 72   | 88   | 101  | 92   |
| Feb   | 60   | 69   | 88   | 51   |
| March | 58   | 62   | 87   | 40   |
| April | 81   | 86   | 103  | 50   |
| May   | 82   | 84   | 106  | 39   |
| June  | 82   | 71   | 82   | 51   |
| July  | 101  | 129  | 107  | 70   |
| Aug   | 95   | 120  | 101  | 59   |
| Sep   | 115  | 105  | 130  | 54   |
| Oct   | 73   | 79   | 89   | 68   |
| Nov   | 66   | 81   | 57   | 62   |
| Dec   | 80   | 98   | 90   | 55   |
