# Supplementary material for: Patient attendance at a pediatric emergency referral hospital in an area with low COVID-19 incidence
Source: PubMed Central journal article supplement (PMC8516272; doi:10.1371/journal.pone.0258478), 2021-10-14
Supplement: pone.0258478.s005.pdf [file pone.0258478.s005.pdf]

**S5 Table. Changes in the number of inpatients by month and year: NICU and GCU inpatients.**

|       | 2017 | 2018 | 2019 | 2020 |
|-------|------|------|------|------|
| Jan   | 7    | 11   | 11   | 9    |
| Feb   | 9    | 11   | 17   | 18   |
| March | 15   | 9    | 6    | 8    |
| April | 6    | 13   | 16   | 8    |
| May   | 11   | 12   | 9    | 14   |
| June  | 10   | 10   | 8    | 11   |
| July  | 14   | 5    | 13   | 15   |
| Aug   | 8    | 9    | 12   | 11   |
| Sep   | 11   | 8    | 18   | 16   |
| Oct   | 9    | 6    | 12   | 11   |
| Nov   | 11   | 11   | 13   | 12   |
| Dec   | 18   | 10   | 19   | 3    |
