# Supplementary material for: Patient attendance at a pediatric emergency referral hospital in an area with low COVID-19 incidence
Source: PubMed Central journal article supplement (PMC8516272; doi:10.1371/journal.pone.0258478), 2021-10-14
Supplement: pone.0258478.s006.pdf [file pone.0258478.s006.pdf]

**S6 Table. Changes in the number of cases of influenza by month and year.**

|       | 2017 | 2018 | 2019 | 2020 |
|-------|------|------|------|------|
| Jan   | 38   | 60   | 75   | 29   |
| Feb   | 35   | 47   | 32   | 5    |
| March | 7    | 9    | 8    | 1    |
| April | 5    | 0    | 7    | 0    |
| May   | 2    | 1    | 1    | 0    |
| June  | 0    | 0    | 1    | 0    |
| July  | 0    | 0    | 1    | 0    |
| Aug   | 1    | 0    | 0    | 0    |
| Sep   | 5    | 0    | 1    | 0    |
| Oct   | 2    | 0    | 0    | 0    |
| Nov   | 2    | 0    | 1    | 0    |
| Dec   | 19   | 12   | 46   | 0    |
