# Supplementary material for: Patient attendance at a pediatric emergency referral hospital in an area with low COVID-19 incidence
Source: PubMed Central journal article supplement (PMC8516272; doi:10.1371/journal.pone.0258478), 2021-10-14
Supplement: pone.0258478.s007.pdf [file pone.0258478.s007.pdf]

**S7 Table. Changes in the number of cases of respiratory syncytial virus infection by month and year.**

|       | 2017 | 2018 | 2019 | 2020 |
|-------|------|------|------|------|
| Jan   | 16   | 8    | 9    | 3    |
| Feb   | 3    | 12   | 8    | 5    |
| March | 4    | 4    | 29   | 4    |
| April | 6    | 12   | 36   | 2    |
| May   | 3    | 9    | 13   | 0    |
| June  | 3    | 12   | 6    | 0    |
| July  | 6    | 34   | 10   | 0    |
| Aug   | 32   | 60   | 40   | 0    |
| Sep   | 80   | 49   | 57   | 0    |
| Oct   | 35   | 12   | 23   | 0    |
| Nov   | 15   | 3    | 4    | 1    |
| Dec   | 19   | 8    | 9    | 0    |
