# Supplementary material for: Patient attendance at a pediatric emergency referral hospital in an area with low COVID-19 incidence
Source: PubMed Central journal article supplement (PMC8516272; doi:10.1371/journal.pone.0258478), 2021-10-14
Supplement: pone.0258478.s008.pdf [file pone.0258478.s008.pdf]

**S8 Table. Changes in the number of cases of infectious gastroenteritis by month and year.**

|       | 2017 | 2018 | 2019 | 2020 |
|-------|------|------|------|------|
| Jan   | 34   | 31   | 78   | 26   |
| Feb   | 36   | 12   | 41   | 43   |
| March | 37   | 14   | 52   | 10   |
| April | 40   | 33   | 44   | 3    |
| May   | 45   | 75   | 57   | 7    |
| June  | 27   | 71   | 34   | 11   |
| July  | 38   | 54   | 40   | 24   |
| Aug   | 25   | 43   | 35   | 31   |
| Sep   | 16   | 31   | 38   | 18   |
| Oct   | 17   | 23   | 25   | 15   |
| Nov   | 26   | 24   | 6    | 14   |
| Dec   | 44   | 120  | 42   | 14   |
